# Supplementary material for: Ethnomedical Survey of the Plants Used by Traditional Healers in Narok County, Kenya
Source: Evid Based Complement Alternat Med. 2019 Jan 1;2019:8976937. doi: 10.1155/2019/8976937 (PMC6332960; doi:10.1155/2019/8976937)
Supplement: Supplementary Materials — Details of the medicinal plant uses. [file 8976937.f1.zip]

Archive with 3 entries (2 files):
- 8976937.f1.zip/
- 8976937.f1.zip/Supplementary Material - Medicinal Plant uses_ECAM_2604405.pdf
- 8976937.f1.zip/Supplementary Material - Medicinal Plant uses_ECAM_2604406.docx
